# Supplementary material
Source: HighWire-hosted journal article supplement (https://www.annfammed.org/content/suppl/2015/01/09/13.1.23)
Supplement: Rosenblatt_Supp_App.pdf [file Rosenblatt_Supp_App.pdf]

Supplementary materials for:

Rosenblatt RA, Andrilla CA, Catlin M, Larson EH. Geographic and specialty distribution of physicians trained to provide office-based treatment of opioid use disorder in the United States. *Ann Fam Med.* 2015;13(1):23-26.

Supplemental Appendix . Number and Percentage of Waivered and Non-Waivered Physicians by Specialty

| Specialty                         | Number (%) of Waivered Physicians with this Specialty | Number (%) Non-Waivered | Total (%)       | Percentage of Specialty with a DEA Waiver |
|-----------------------------------|-------------------------------------------------------|-------------------------|-----------------|-------------------------------------------|
| Psychiatry                        | 7,584 (41.6)                                          | 39,157 (83.8)           | 46,741 (5.6)    | 16.2                                      |
| Family medicine                   | 4,066 (22.3)                                          | 108,913 (96.4)          | 112,979 (13.6)  | 3.6                                       |
| Internal medicine                 | 2,618 (14.4)                                          | 119,980 (97.9)          | 122,598 (14.8)  | 2.1                                       |
| Anesthesiology                    | 753 (4.1)                                             | 44,884 (98.4)           | 45,637 (5.5)    | 1.7                                       |
| Physical medicine and rehab       | 471 (2.6)                                             | 8,441 (94.7)            | 8,912 (1.1)     | 5.3                                       |
| Emergency medicine                | 370 (2.0)                                             | 37,645 (99.0)           | 38,015 (4.6)    | 1.0                                       |
| Other specialty                   | 339 (1.9)                                             | 71,891 (99.5)           | 72,230 (8.7)    | 0.5                                       |
| Internal medicine sub-specialties | 333(1.8)                                              | 112,155 (99.7)          | 112,488 (13.6)  | 0.3                                       |
| Pain management                   | 279 (1.5)                                             | 1,559 (84.8)            | 1,838 (0.2)     | 15.2                                      |
| Surgery and sub specialties       | 227 (1.3)                                             | 116,442 (99.8)          | 116,669 (14.1)  | 0.2                                       |
| Addiction medicine*               | 182 (1.0)                                             | 62 (25.4)               | 244 (0.03)      | 74.6                                      |
| Obstetrics-gynecology             | 181 (1.0)                                             | 41,541 (99.6)           | 41,722 (5.0)    | 0.4                                       |
| Pediatrics and sub-specialties    | 147 (0.8)                                             | 76,449 (99.8)           | 76,596 (9.2)    | 0.2                                       |
| Neurology                         | 147 (0.8)                                             | 13,521 (98.9)           | 13,668 (1.7)    | 1.1                                       |
| Missing specialty                 | 528 (2.9)                                             | 18,179 (97.2)           | 18,707 (2.3)    | 2.8                                       |
| Total                             | 18,225 (100.0)                                        | 810,819 (100.0)         | 829,044 (100.0) | 2.2                                       |

\* The American Board of Medical Specialties does not recognize addiction medicine as a specialty,<sup>9</sup> therefore the number of persons listed on the AMA Masterfile as board-certified addiction medicine specialists is in error, and the number of persons dedicating at least part of their practice to addiction medicine is undercounted. The American Board of Addiction Medicine has certified more than 5,000 physicians since 1984.<sup>8</sup> Some 3,000 physicians are members of the American Society of Addiction Medicine.<sup>15</sup> The Center for Addiction Medicine at Columbia University estimates that there are 1,200 addiction medicine specialists and another 300 addiction medicine psychiatrists.<sup>16</sup> Given these unresolved issues, it is impossible to know how many certified addiction medicine specialists have received a DEA waiver.
